# Supplementary material for: Highly selective separation of toluene and methylcyclohexane based on nonporous adaptive crystals of hybrid[3]arene
Source: Royal Society of Chemistry journal article supplement (doi:10.1039/d4qm00590b), 2024-01-01
Supplement: d4qm00590b1.pdf [file d4qm00590b1.pdf]

# Highly Selective Separation of Toluene and Methylcyclohexane Based on Nonporous Adaptive Crystals of Hybrid[3]arene

Shiqi Wei, Yuhao Wang and Jiong Zhou\*

\*Department of Chemistry, College of Sciences, Northeastern University, Shenyang 110819, P. R. China

Email address: zhoujiong@mail.neu.edu.cn

## Electronic Supporting Information (18 pages)

|                                                                                                     |     |
|-----------------------------------------------------------------------------------------------------|-----|
| 1. <i>Materials</i>                                                                                 | S2  |
| 2. <i>Methods</i>                                                                                   | S2  |
| 3. <i>Crystallography Data</i>                                                                      | S4  |
| 4. <i>Characterization of Nonporous Adaptive Crystals of <b>H</b> (<b>H<math>\alpha</math></b>)</i> | S5  |
| 5. <i>Single-Component Toluene and Methylcyclohexane Adsorption Experiments</i>                     | S6  |
| 6. <i>Noncovalent Interactions Analysis in Single Crystal Structure of Tol@<b>H</b></i>             | S9  |
| 7. <i>Uptake from the Mixture of Toluene and Methylcyclohexane by <b>H<math>\alpha</math></b></i>   | S11 |
| 8. <i>Recyclability of <b>H<math>\alpha</math></b></i>                                              | S13 |
| 9. <i>Liquid-Solid Adsorption</i>                                                                   | S15 |
| 10. <i>Reference</i>                                                                                | S18 |

## 1. Materials

All chemicals, including toluene (Tol) and methylcyclohexane (MCH), were purchased and used as received. Hybrid[3]arene **H** was synthesized as described previously.<sup>S1</sup> Activated crystalline **H** (**H $\alpha$** ) was recrystallized from acetone and dried under vacuum at 120 °C overnight.

## 2. Methods

### 2.1. Solution NMR

Solution <sup>1</sup>H NMR spectra were recorded at 600 MHz using a Bruker Avance 600 NMR spectrometer.

### 2.2. Powder X-ray Diffraction

Powder X-ray diffraction (PXRD) data were collected on a Rigaku Ultimate-IV X-ray diffractometer operating at 40 kV/30 mA using the Cu K $\alpha$  line ( $\lambda = 1.5418 \text{ \AA}$ ). Data were measured over the range of 5–45° in 5°/min steps over 8 min.

### 2.3. Thermogravimetric Analysis

Thermogravimetric analysis (TGA) was carried out using a Q5000IR analyzer (TA Instruments) with an automated vertical overhead thermobalance. The samples were heated at 10 °C/min using N<sub>2</sub> as the protective gas.

### 2.4. Single Crystal Growth

The single crystal of Tol@**H** was grown by slow evaporation: 2 mg of dry **H $\alpha$**  powders were put in a small vial where 2 mL of Tol was added. Then adding chloroform until all **H $\alpha$**  powders were dissolved. The resultant transparent solution was allowed to evaporate slowly to give nice colorless crystals in 2 to 3 days.

### 2.5. Single Crystal X-ray Diffraction

Single crystal X-ray diffraction data were collected on a Bruker D8 VENTURE CMOS X-ray diffractometer with graphite monochromated Mo K $\alpha$  radiation ( $\lambda = 0.71073 \text{ \AA}$ ).

### 2.6. Head Space Gas Chromatography

Head Space Gas Chromatography (HS-GC) Analysis: HS-GC measurements were carried out using an Agilent 7890B instrument configured with an FID detector and a DB-624 column (30 m  $\times$  0.53 mm  $\times$  3.0  $\mu$ m). Samples were analyzed using headspace injections and were performed by incubating the sample at 100 °C for 10 min, then sampling 1 mL of the headspace. The following HS-GC method was used: the oven was programmed from 50 °C and ramped in 10 °C min<sup>-1</sup> increments to 150 °C with 15 min hold; the

total run time was 25 min; the injection temperature was 250 °C; the detector temperature was 280 °C with nitrogen, air, and make-up flow rates of 35, 350, and 35 mL min<sup>-1</sup>, respectively; the helium (carrier gas) flow rate was 3.0 mL min<sup>-1</sup>. The samples were injected in the split mode (30:1).

### 2.7. *Density Functional Theory (DFT) Calculation*

All calculations were performed by DFT using the B3LYP hybrid function combined with 6-31G(dp) basis set under Gaussian G09. Using single-crystal structures as input files, IGM analyses were carried out by Multiwfn 3.6 program through function 20 (visual study of weak interaction) and visualized using Visual Molecular Dynamics software.

### 3. Crystallography Data

Table S1. Experimental single crystal X-ray data for Tol@H.

| Compound                                            | Tol@H                                                            |
|-----------------------------------------------------|------------------------------------------------------------------|
| Crystallization Solvent                             | Toluene                                                          |
| Collection Temperature [K]                          | 300                                                              |
| Formula                                             | C <sub>81</sub> H <sub>92</sub> O <sub>16</sub>                  |
| Formula Weight                                      | 1321.54                                                          |
| Crystal System                                      | Triclinic                                                        |
| Space Group                                         | <i>P</i> -1                                                      |
| <i>a</i> [Å]                                        | 10.9484(18)                                                      |
| <i>b</i> [Å]                                        | 13.3498(18)                                                      |
| <i>c</i> [Å]                                        | 15.691(2)                                                        |
| $\alpha$ [°]                                        | 110.662(8)                                                       |
| $\beta$ [°]                                         | 99.115(8)                                                        |
| $\gamma$ [°]                                        | 107.401(8)                                                       |
| <i>V</i> [Å <sup>3</sup> ]                          | 1956.1(5)                                                        |
| <i>Z</i>                                            | 1                                                                |
| <i>D</i> <sub>calcd</sub> [Mg cm <sup>-3</sup> ]    | 1.122                                                            |
| Absorption coefficient [mm <sup>-1</sup> ]          | 0.624                                                            |
| <i>F</i> (000)                                      | 706                                                              |
| Crystal size [mm <sup>3</sup> ]                     | 0.200 × 0.200 × 0.200                                            |
| Theta range for data collection [°]                 | 3.151 to 66.466                                                  |
| Index ranges                                        | -12 ≤ <i>h</i> ≤ 13, -15 ≤ <i>k</i> ≤ 15, -18 ≤ <i>l</i> ≤ 18    |
| Reflections collected                               | 21988                                                            |
| Independent reflections                             | 6812 [ <i>R</i> <sub>int</sub> = 0.1237]                         |
| Data / restraints / parameters                      | 6182 / 58 / 466                                                  |
| Final <i>R</i> indices [ <i>I</i> > 2σ( <i>I</i> )] | <i>R</i> <sub>1</sub> = 0.1297, w <i>R</i> <sub>2</sub> = 0.2953 |
| <i>R</i> indices (all data)                         | <i>R</i> <sub>1</sub> = 0.2221, w <i>R</i> <sub>2</sub> = 0.3444 |
| Goodness-of-fit on <i>F</i> <sup>2</sup>            | 1.018                                                            |
| Largest diff. peak and hole [e.Å <sup>-3</sup> ]    | 0.529 and -0.340                                                 |
| CCDC                                                | 2304364                                                          |

#### 4. Characterization of Nonporous Adaptive Crystals of **H $\alpha$**

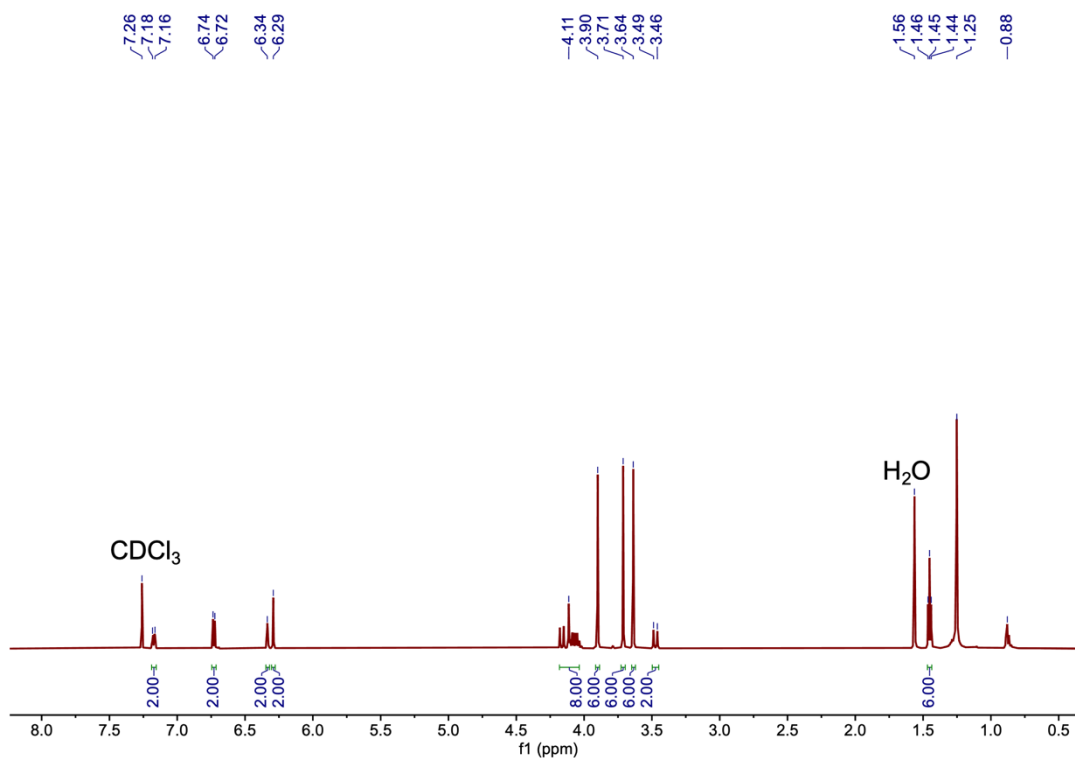

**Figure S1.** <sup>1</sup>H NMR spectrum (600 MHz, CDCl<sub>3</sub>, 293 K) of **H $\alpha$** .

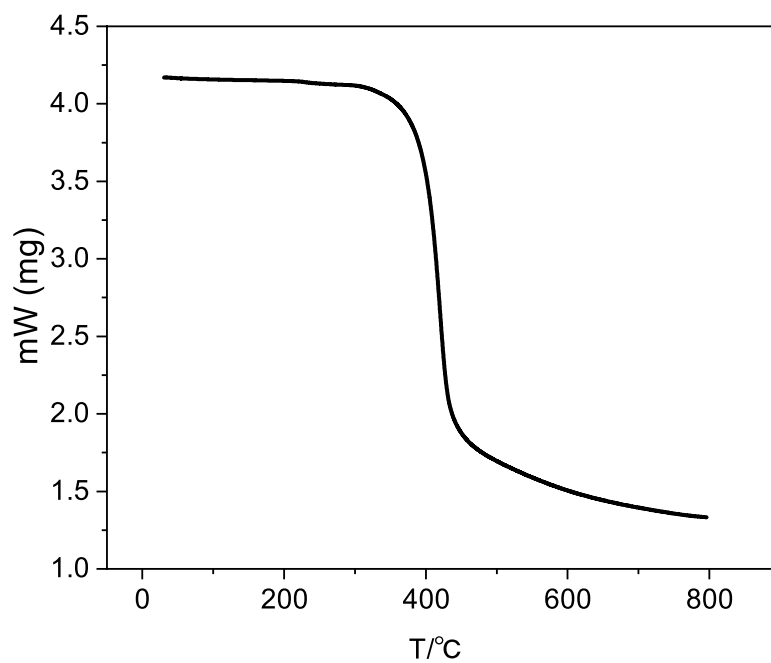

**Figure S2.** Thermogravimetric analysis of **H $\alpha$** .

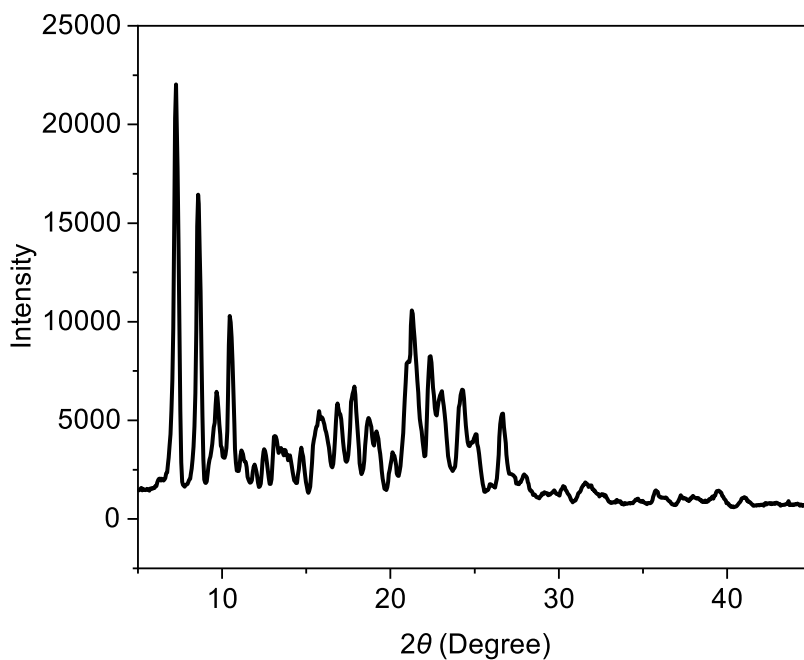

**Figure S3.** Powder X-ray diffraction pattern of **H $\alpha$** .

### ***5. Single-Component Toluene and Methylcyclohexane Adsorption Experiments***

An open 4 mL vial containing 1.00 mg of guest-free **H $\alpha$**  was placed in a sealed 20 mL vial containing 0.50 mL Tol or MCH. Uptake by **H $\alpha$**  was measured hour by hour by completely dissolving the crystals and measured the molecule ratios of Tol or MCH to **H $\alpha$**  by  $^1\text{H}$  NMR. The results showed that the adsorption of Tol by **H $\alpha$**  could reach 0.8 mol/**H $\alpha$** . However, the adsorption of MCH by **H $\alpha$**  could be ignored.  $^1\text{H}$  NMR experiments were performed by dissolving **H $\alpha$**  after vapor adsorption in  $\text{CDCl}_3$ . TGA profiles were recorded using **H $\alpha$**  after vapor adsorption.

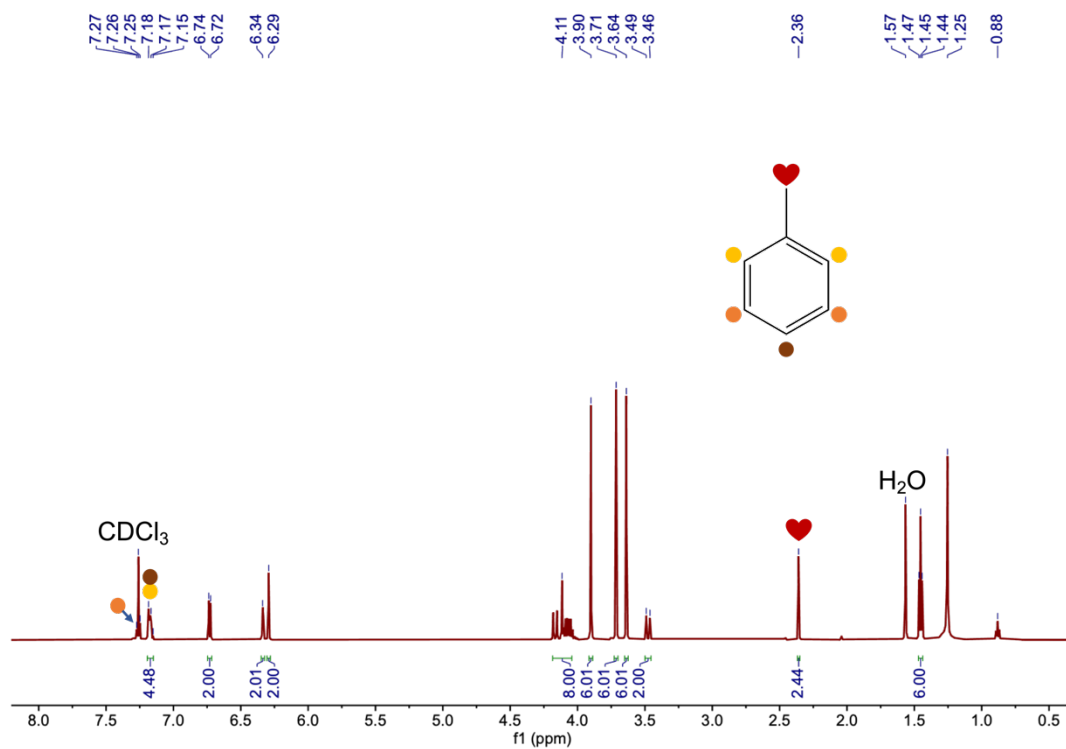

**Figure S4.** <sup>1</sup>H NMR spectrum (600 MHz, CDCl<sub>3</sub>, 293 K) of **H $\alpha$**  after adsorption of Tol vapor for 12 h.

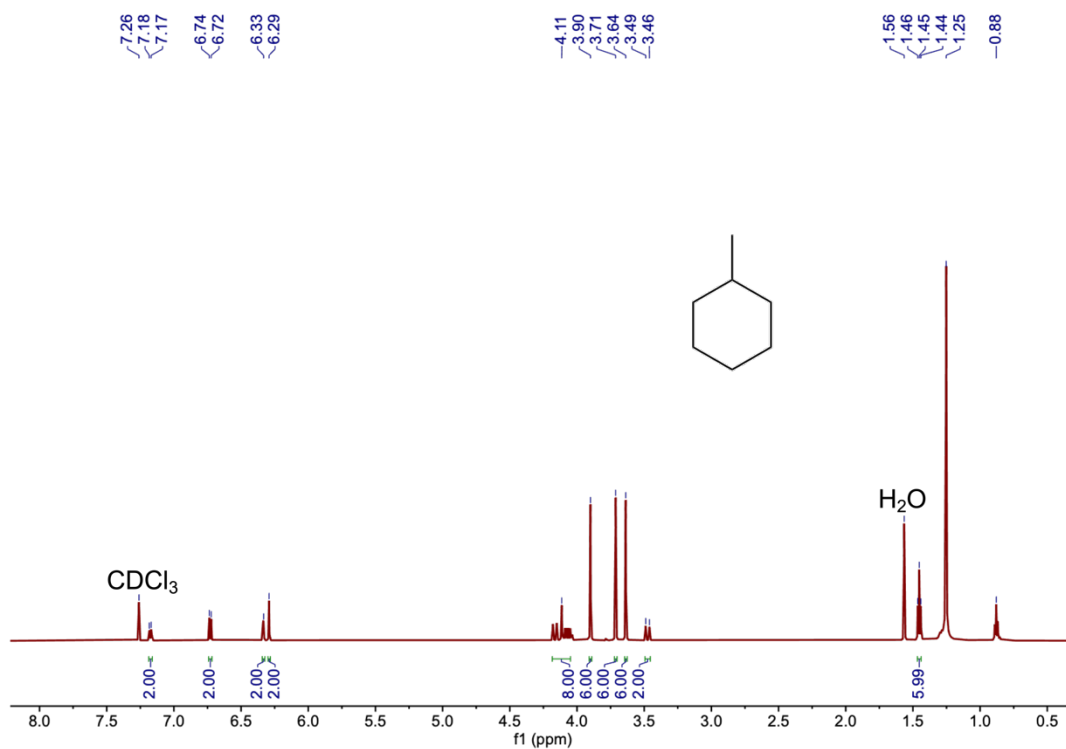

**Figure S5.** <sup>1</sup>H NMR spectrum (600 MHz, CDCl<sub>3</sub>, 293 K) of **H $\alpha$**  after adsorption of MCH vapor for 12 h.

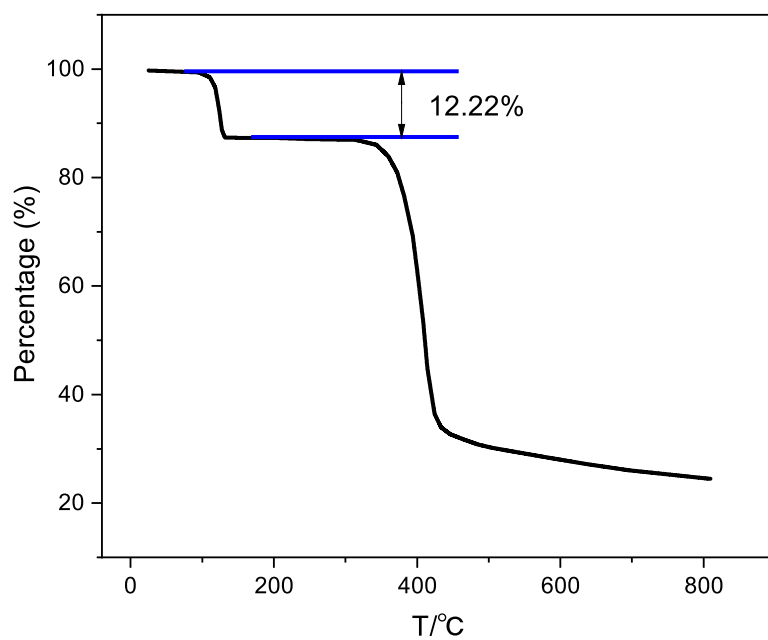

**Figure S6.** Thermogravimetric analysis of **H $\alpha$**  after adsorption of Tol vapor for 12 h. The weight loss below 150 °C can be calculated as 0.9 Tol molecule per **H $\alpha$**  molecule.

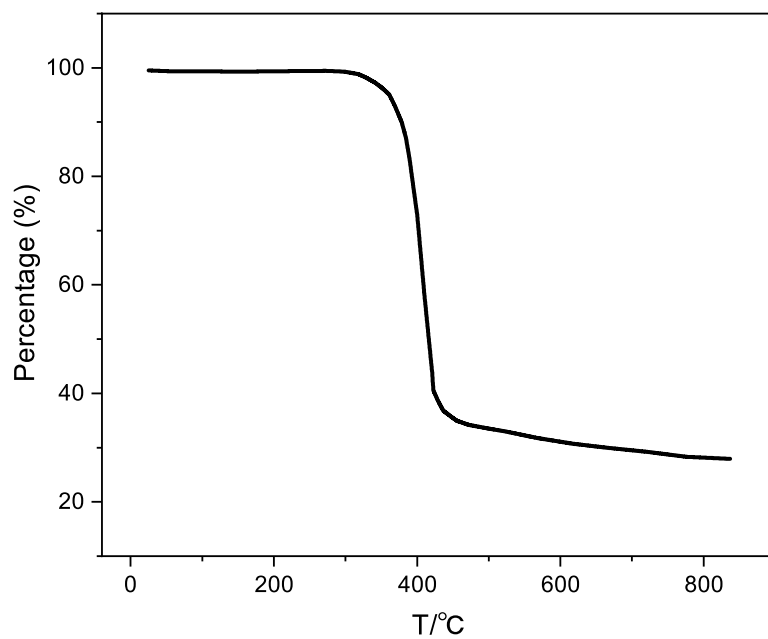

**Figure S7.** Thermogravimetric analysis of **H $\alpha$**  after adsorption of MCH vapor for 12 h.



## 6. Noncovalent Interactions Analysis in Single Crystal Structure of Tol@H

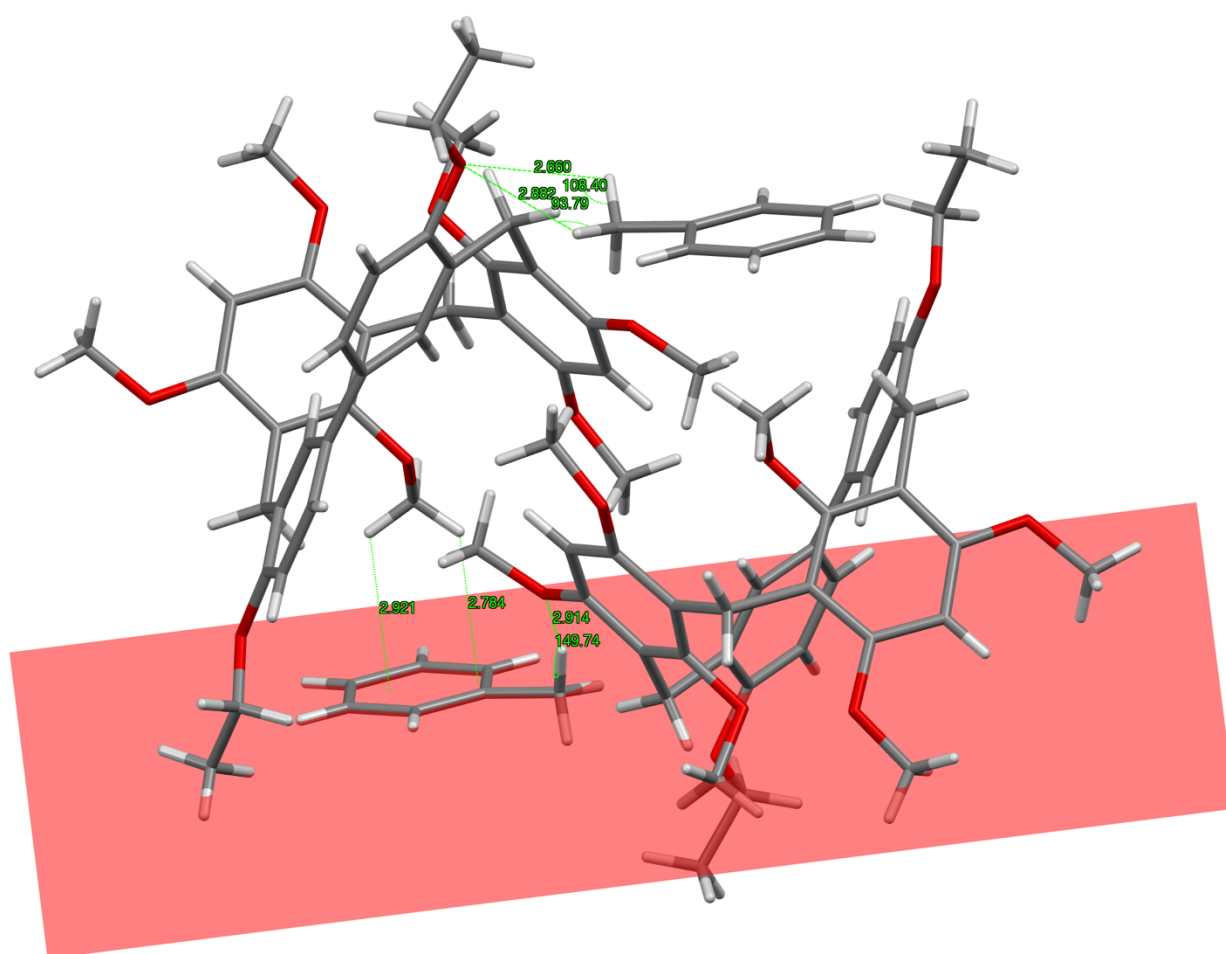

**Figure S8.** Illustration of C-H... $\pi$  and C-H...O interactions between **H** and Tol. H- $\pi$ -plane distances: 2.921 Å; 2.784 Å, H-O distances: 2.660 Å; 2.882 Å; 2.914 Å; angles: 108.40°; 93.79°; 149.74°.

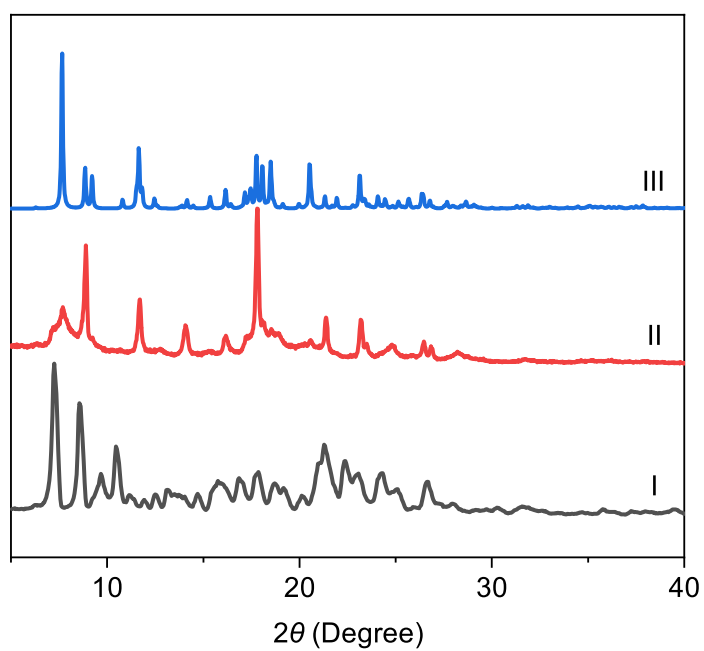

**Figure S9.** PXRD patterns of: (I) original **H $\alpha$** ; (II) **H $\alpha$**  after adsorption of Tol vapor; (III) simulated from the single crystal structure of Tol@**H**.

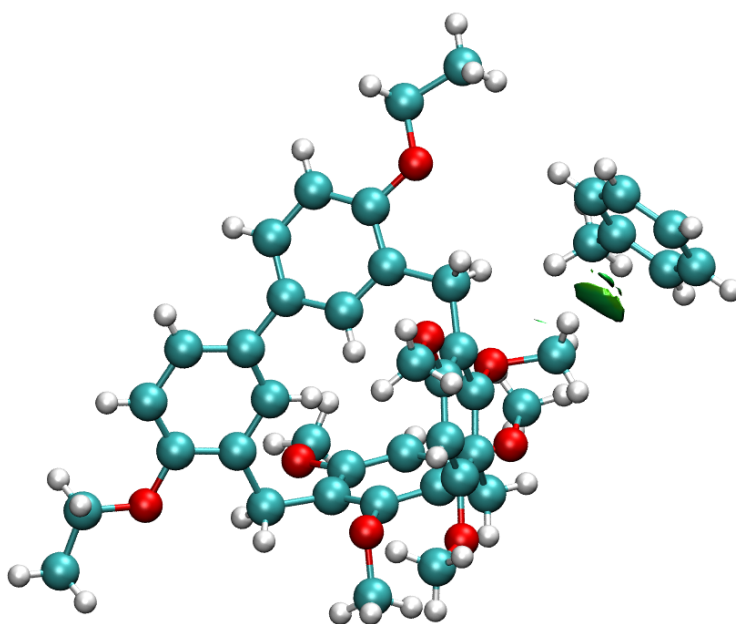

**Figure S10.** Visual study of weak intermolecular interactions of Tol@**H** by DFT calculation.

## 7. Uptake from the Mixture of Toluene and Methylcyclohexane by **H $\alpha$**

An open 4 mL vial containing 1.00 mg of guest-free **H $\alpha$**  was placed in a sealed 20 mL vial containing Tol and MCH (0.5 mL:0.5 mL). Uptake by **H $\alpha$**  was measured hour by hour by completely dissolving the crystals and measured the molecule ratios of Tol and MCH to **H $\alpha$**  by  $^1\text{H}$  NMR. **H $\alpha$**  could selectively adsorb Tol but hardly adsorb MCH. The adsorption of Tol could reach 0.80 mol/**H $\alpha$** .

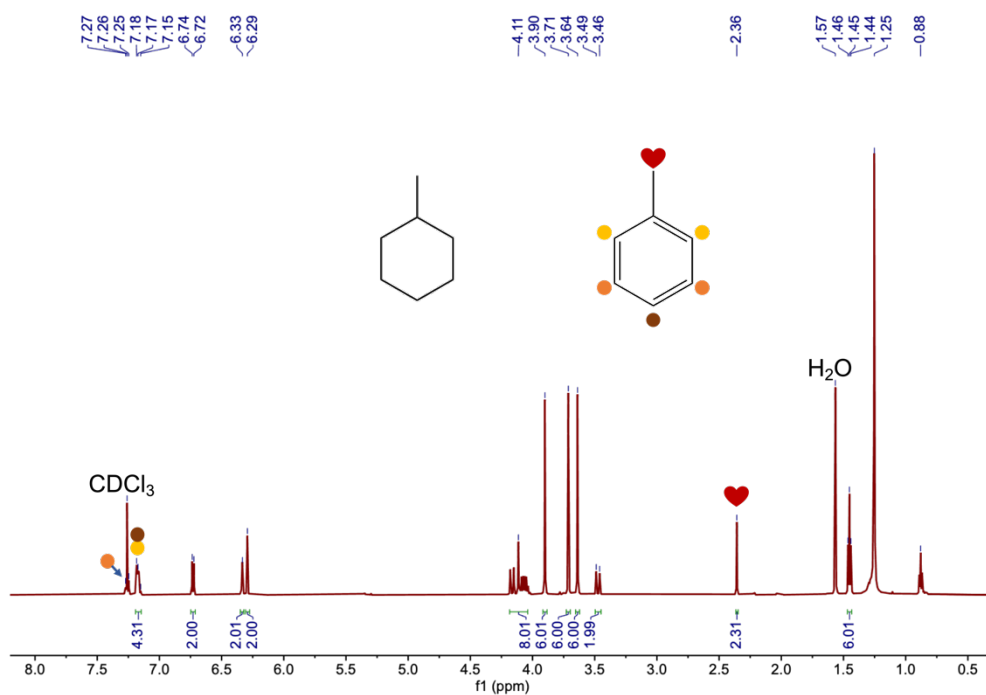

**Figure S11.**  $^1\text{H}$  NMR spectrum (600 MHz,  $\text{CDCl}_3$ , 293 K) of **H $\alpha$**  after adsorption of the vapor mixture of Tol and MCH ( $v:v = 1:1$ ) for 24 h.

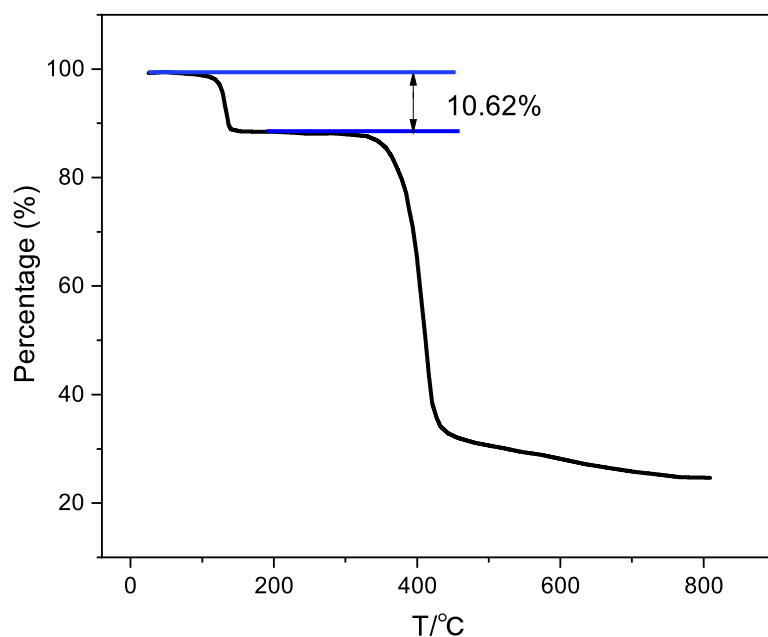

**Figure S12.** Thermogravimetric analysis of **H $\alpha$**  after adsorption of the vapor mixture of Tol and MCH ( $v:v = 1:1$ ) for 24 h. The weight loss below 150 °C can be calculated as 0.8 Tol molecule per **H $\alpha$**  molecule.

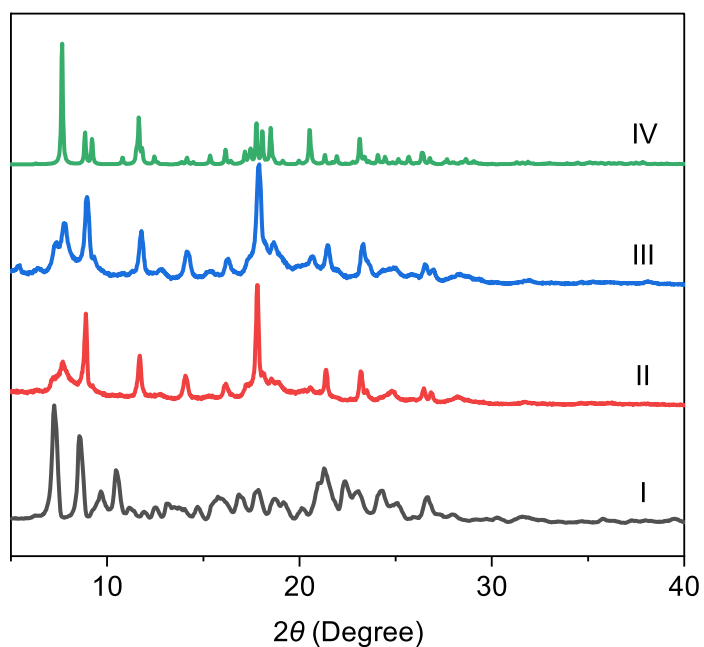

**Figure S13.** PXRD patterns of: (I) original **H $\alpha$** ; (II) **H $\alpha$**  after adsorption of Tol vapor; (III) **H $\alpha$**  after adsorption of the vapor mixture of Tol and MCH ( $v:v = 1:1$ ); (IV) simulated from the single crystal structure of Tol@**H**.

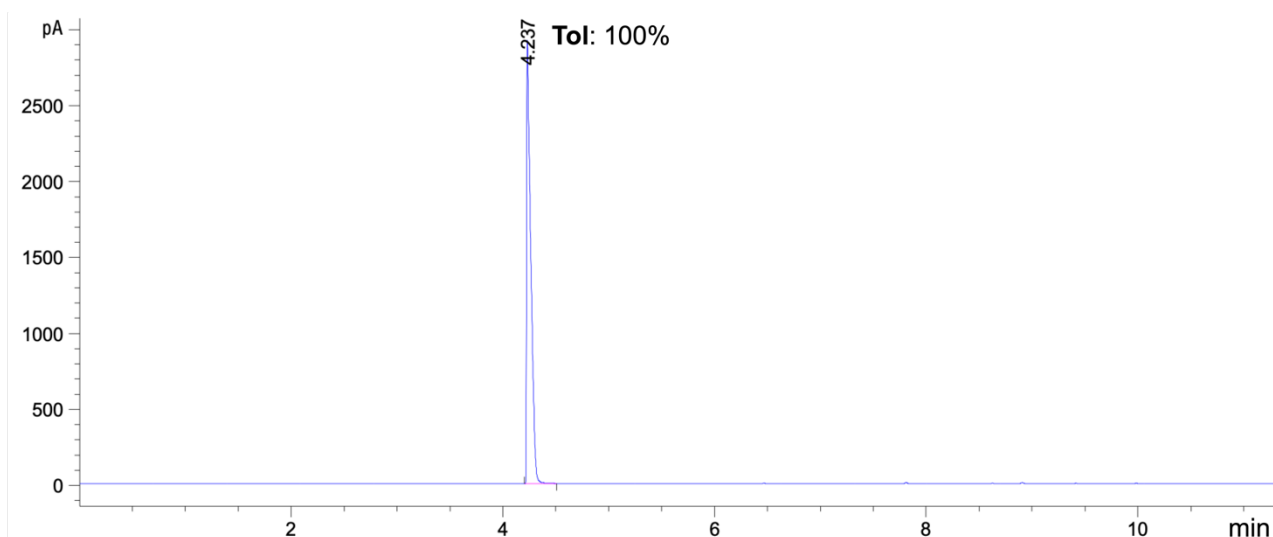

**Figure S14.** Relative uptakes of Tol and MCH vapors adsorbed by **H $\alpha$**  for 24 h using head space gas chromatography.

### 8. Recyclability of **H $\alpha$**

An open 5 mL vial containing 20.0 mg of Tol@**H** was desolvated by heating under vacuum at 120 °C overnight. The resultant crystals were characterized by PXRD, <sup>1</sup>H NMR and head space gas chromatography experiments.

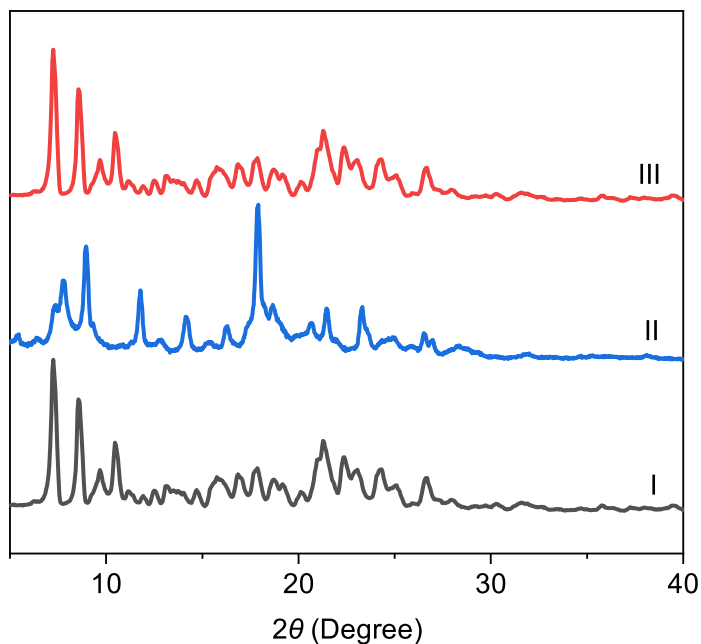

**Figure S15.** PXRD patterns of: (I) original **H $\alpha$** ; (II) **H $\alpha$**  after adsorption of the vapor mixture of Tol and MCH (v:v = 1:1); (III) **H $\alpha$**  after 5 adsorption-desorption cycles.

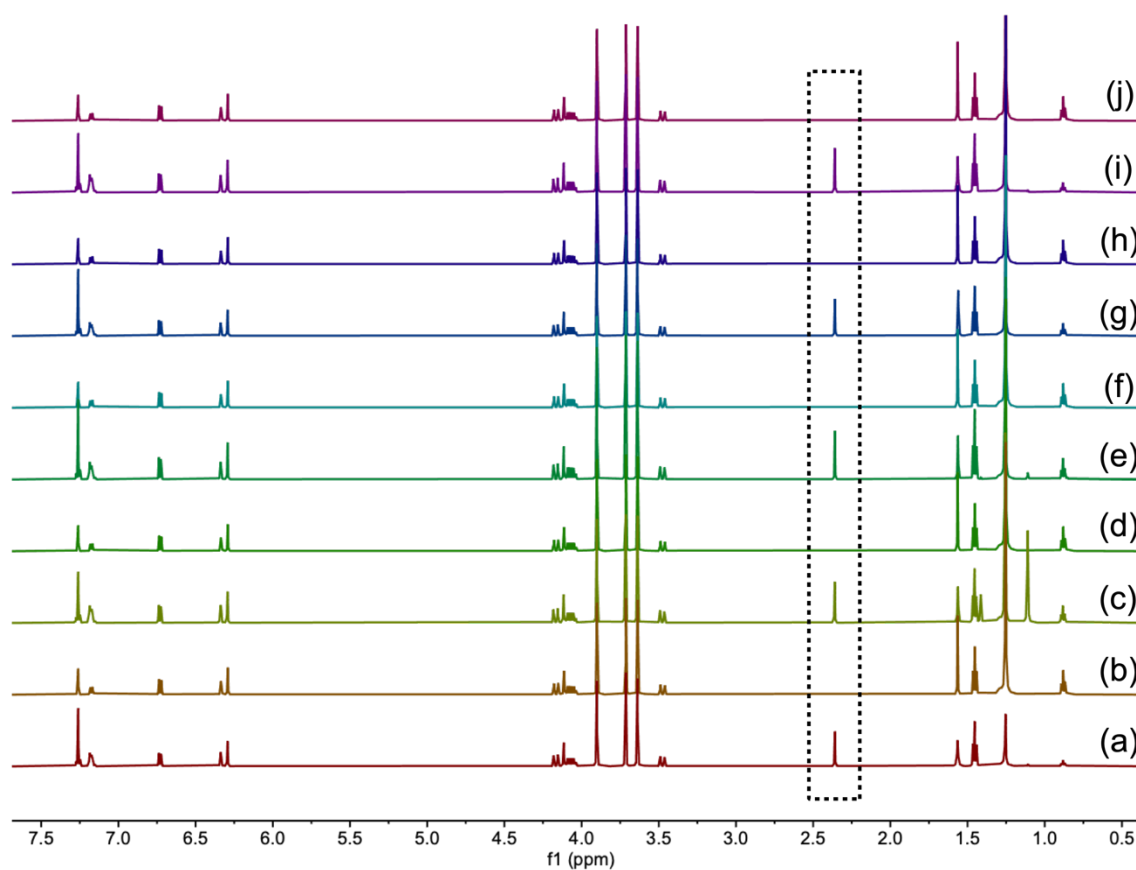

**Figure S16.**  $^1\text{H}$  NMR spectra (600 MHz,  $\text{CDCl}_3$ , 293 K) of **Ha** after adsorption of the vapor mixture of Tol and MCH ( $v:v = 1:1$ ) for 5 cycles: (a) **Ha** after adsorption of the vapor mixture of Tol and MCH for the first cycle; (b) **Ha** after desorption of Tol for the first cycle; (c) **Ha** after adsorption of the vapor mixture of Tol and MCH for the second cycle; (d) **Ha** after desorption of Tol for the second cycle; (e) **Ha** after adsorption of the vapor mixture of Tol and MCH for the third cycle; (f) **Ha** after desorption of Tol for the third cycle; (g) **Ha** after adsorption of the vapor mixture of Tol and MCH for the fourth cycle; (h) **Ha** after desorption of Tol for the fourth cycle; (i) **Ha** after adsorption of the vapor mixture of Tol and MCH for the fifth cycle; (j) **Ha** after desorption of Tol for the fifth cycle.

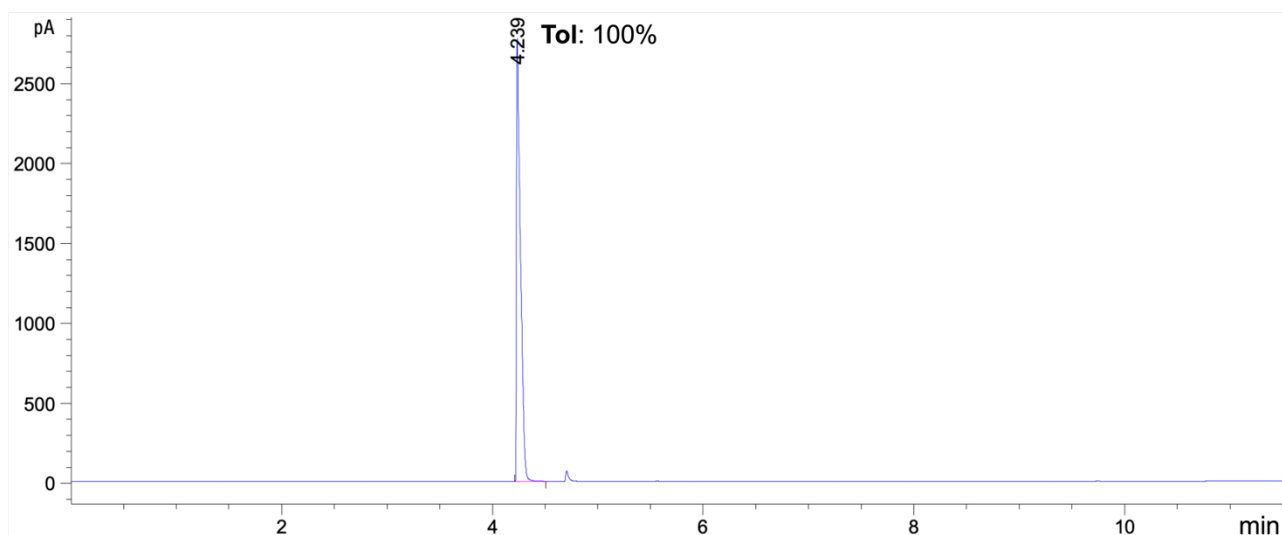

**Figure S17.** Relative uptakes of Tol and MCH vapors adsorbed by **H $\alpha$**  after 5 cycles using head space gas chromatography.

## 9. Liquid-Solid Adsorption

### 9.1 Single-component Adsorption for Toluene and Methylcyclohexane

For each liquid-solid adsorption experiment, 10.0 mg of **H $\alpha$**  were placed in a sealed 2 mL vial containing 1 mL of Tol or MCH liquid. Time-dependent liquid-solid plots of **H $\alpha$**  were measured by completely dissolving the crystals and measuring the molecule ratios of Tol and MCH to **H $\alpha$**  by  $^1\text{H}$  NMR.

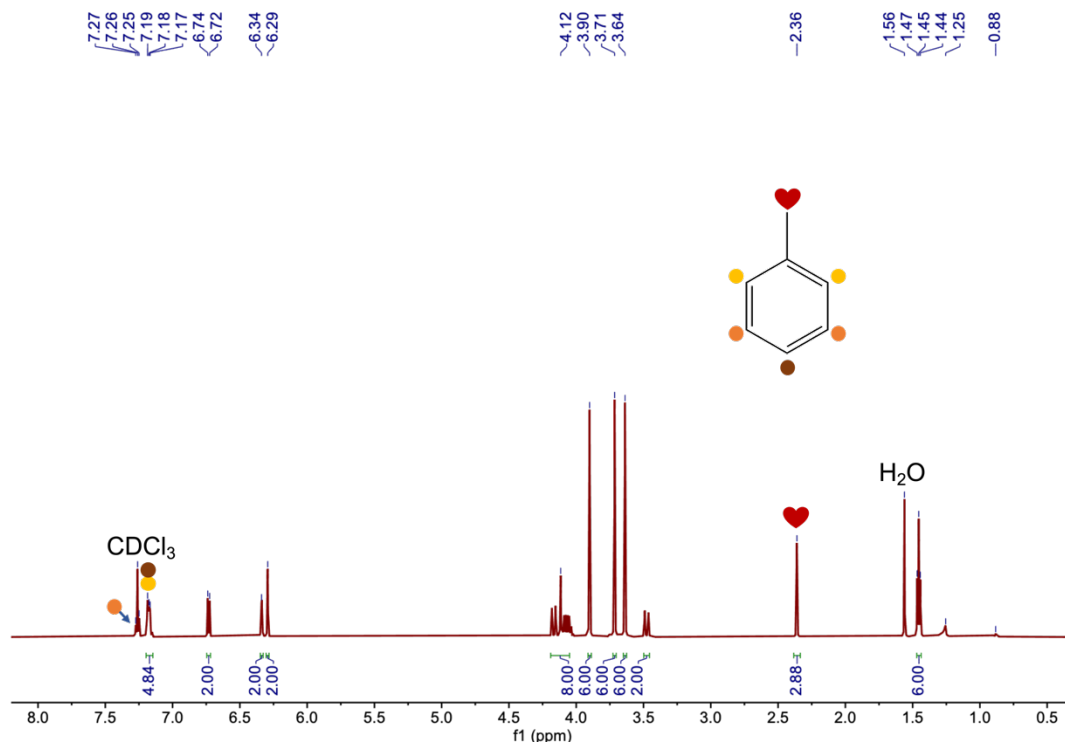

**Figure S18.**  $^1\text{H}$  NMR spectrum (600 MHz,  $\text{CDCl}_3$ , 293 K) of **H $\alpha$**  after adsorption of Tol liquid for 60 min.

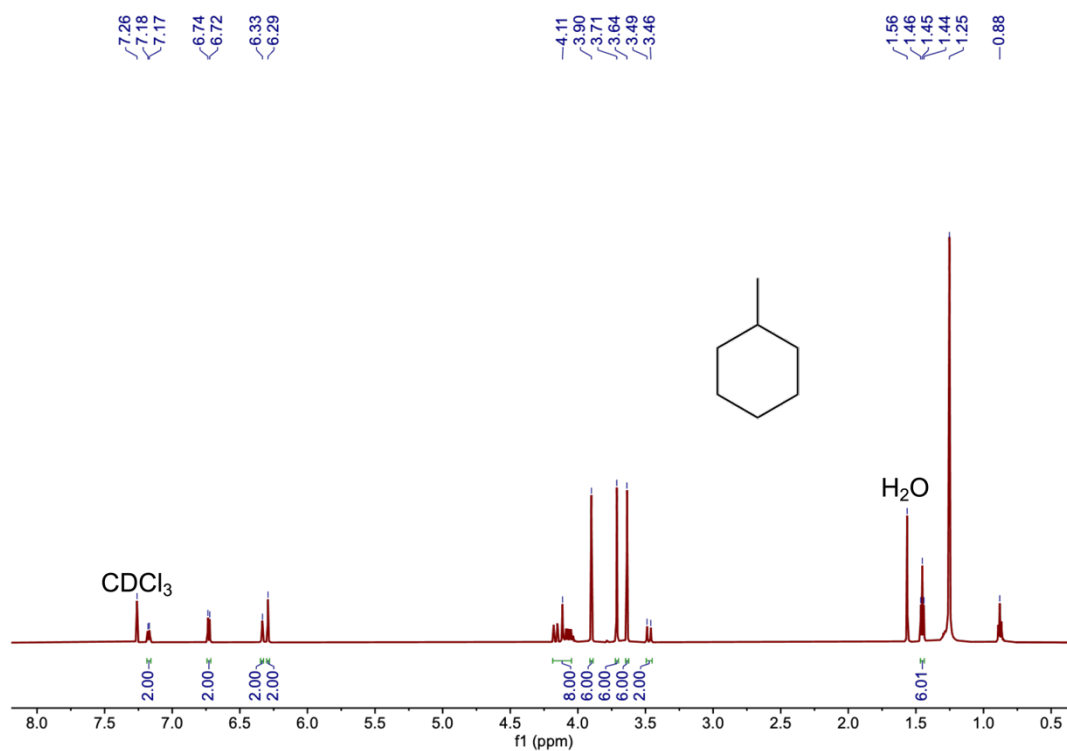

**Figure S19.**  $^1\text{H}$  NMR spectrum (600 MHz,  $\text{CDCl}_3$ , 293 K) of **H $\alpha$**  after adsorption of MCH liquid for 60 min.

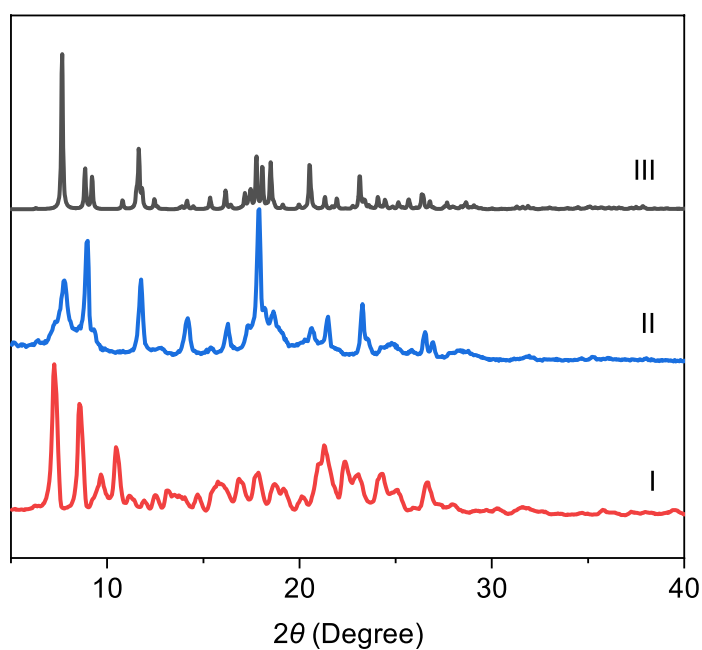

**Figure S20.** PXRD patterns of: (I) original **H $\alpha$** ; (II) **H $\alpha$**  after adsorption of the Tol liquid; (III) simulated from the single crystal structure of Tol@H.



## 9.2 Adsorption for the Mixture of Toluene and Methylcyclohexane

For each liquid-solid adsorption experiment, 10.0 mg of **H $\alpha$**  were placed in a sealed 2 mL vial containing 1 mL of the mixture of Tol and MCH (0.5 mL:0.5 mL). Time-dependent **H $\alpha$**  liquid-solid adsorption plots were measured by completely dissolving the crystals and measuring the molecule ratios of Tol and MCH to **H $\alpha$**  by  $^1\text{H}$  NMR and head space gas chromatography experiments.

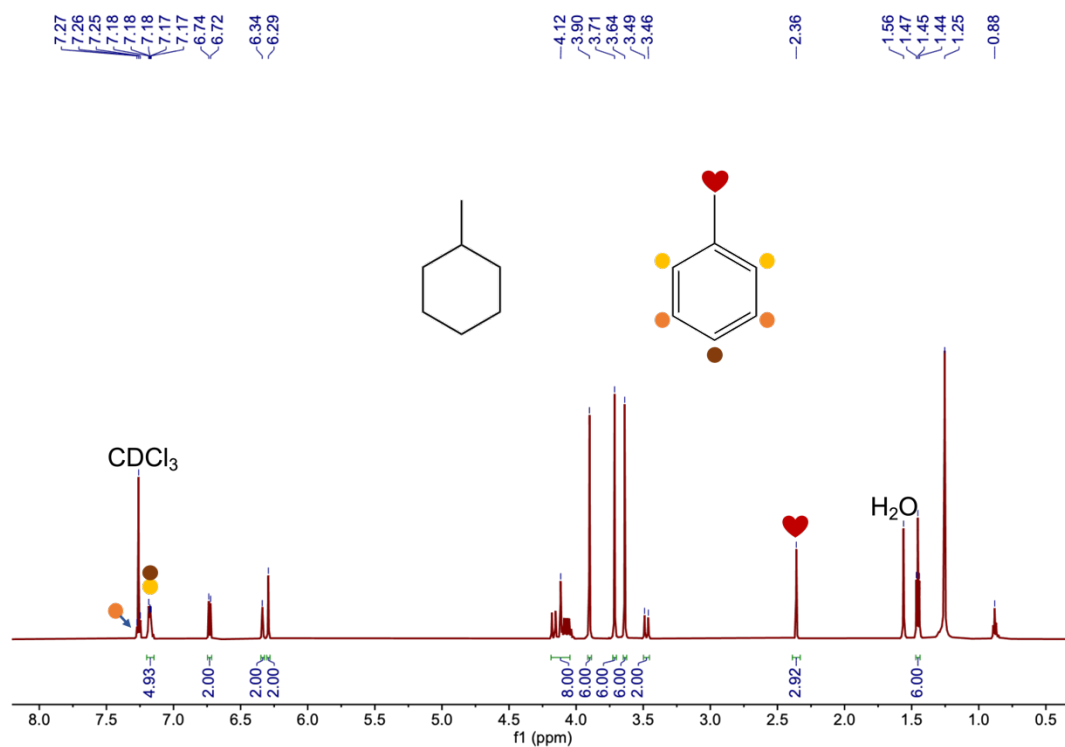

**Figure S21.**  $^1\text{H}$  NMR spectrum (600 MHz,  $\text{CDCl}_3$ , 293 K) of **H $\alpha$**  after adsorption of the liquid mixture of Tol and MCH ( $v:v = 1:1$ ) for 140 min.

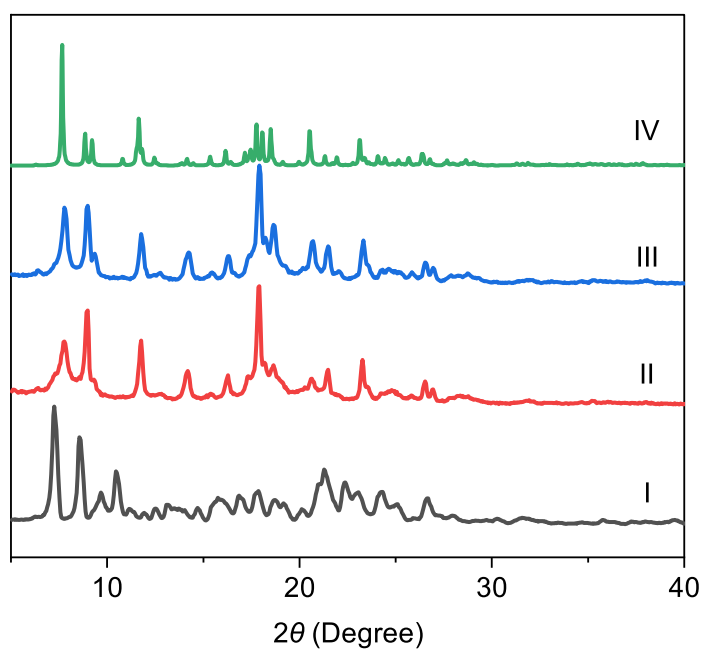

**Figure S22.** PXRD patterns of: (I) original **H $\alpha$** ; (II) **H $\alpha$**  after adsorption of the Tol liquid; (III) **H $\alpha$**  after adsorption of the liquid mixture of Tol and MCH ( $v:v = 1:1$ ); (IV) simulated from the single crystal structure of Tol@**H**.

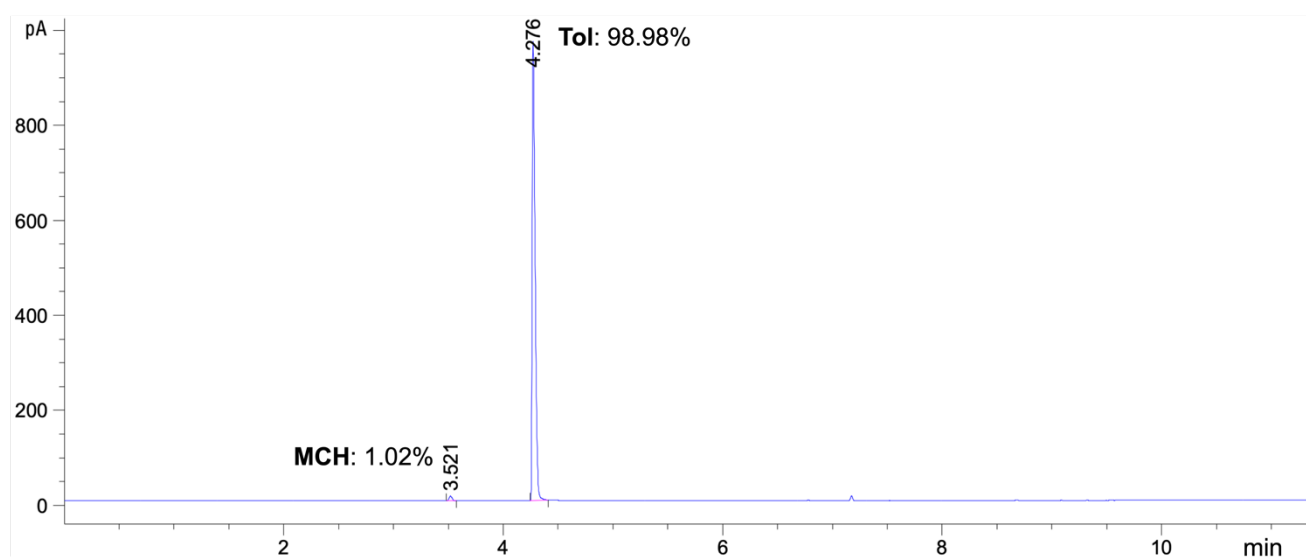

**Figure S23.** Relative uptakes of Tol and MCH liquids adsorbed by **H $\alpha$**  for 140 min using head space gas chromatography.

## 10. Reference

S1 J. Zhou, J. Yang, B. Hua, L. Shao, Z. Zhang and G. Yu, The Synthesis, Structure, and Molecular Recognition Properties of a [2]Calix[1]biphenyl-Type Hybrid[3]arene, *Chem. Commun.*, 2016, **52**, 1622–1624.
